# Supplementary material for: Non-Solvent Synthesis of a Robust Potassium-Doped PdCu-Pd-Cu@C Nanocatalyst for High Selectively Tandem Reactions
Source: MDPI journal article supplement (doi:10.3390/catal11101191), 2021-09-29
Supplement: s1 [file s1]

# Non-Solvent Synthesis of a Robust Potassium-Doped PdCu-Pd-Cu@C Nanocatalyst for High Selectively Tandem Reactions

Sanha Jang <sup>1,†</sup>, Dicky Annas <sup>1,†</sup>, Sehwan Song <sup>2</sup>, Jong-Seong Bae <sup>3</sup>, Sungkyun Park <sup>2, \*</sup>, and Kang Hyun Park <sup>1,\*</sup>

<sup>1</sup> Department of Chemistry, Pusan National University, Busandaehak-ro 63beon-gil, Geumjeong-gu, Busan 46241, Korea; jangs0522@naver.com (S. J.); annas.dicky@gmail.com (D.A.)

<sup>2</sup> Department of Physics, Pusan National University, Busandaehak-ro 63beon-gil, Geumjeong-gu, Busan 46241, Korea; sehwan465@gmail.com (S.S.); psk@pusan.ac.kr (S.P.)

<sup>3</sup> Busan Ceter, Korea Basic Science Institute, Gwahaksandan 1-ro 60beon-gil, Busan 46742, Korea; jsbae@kbsi.re.kr (J.B.)

\* Correspondence: psk@pusan.ac.kr (S.P.); chemistry@pusan.ac.kr (K.H.P.); Tel.: +82-51-510-2595 (S.P.); +82-51-510-2238 (K.H.P.)

<sup>†</sup> These authors contributed equally to this work.

## Table of Contents:

|                                                                                      |    |
|--------------------------------------------------------------------------------------|----|
| Figure S1. HAADF-STEM image and elemental mapping images of PdCu@C nanocatalyst..... | S1 |
| Figure S2. XPS spectra of K doped PdCu@C nanocatalyst.....                           | S2 |
| Figure S3. Mass spectra of 2-phenylbenzofuran.....                                   | S3 |
| Figure S4. Proton NMR spectra of 2-phenylbenzofuran.....                             | S4 |
| Table S1. ICP data of initial K doped PdCu@C nanocatalyst.....                       | S5 |
| Table S2. ICP data of 5 time re-used K doped PdCu@C nanocatalyst.....                | S6 |

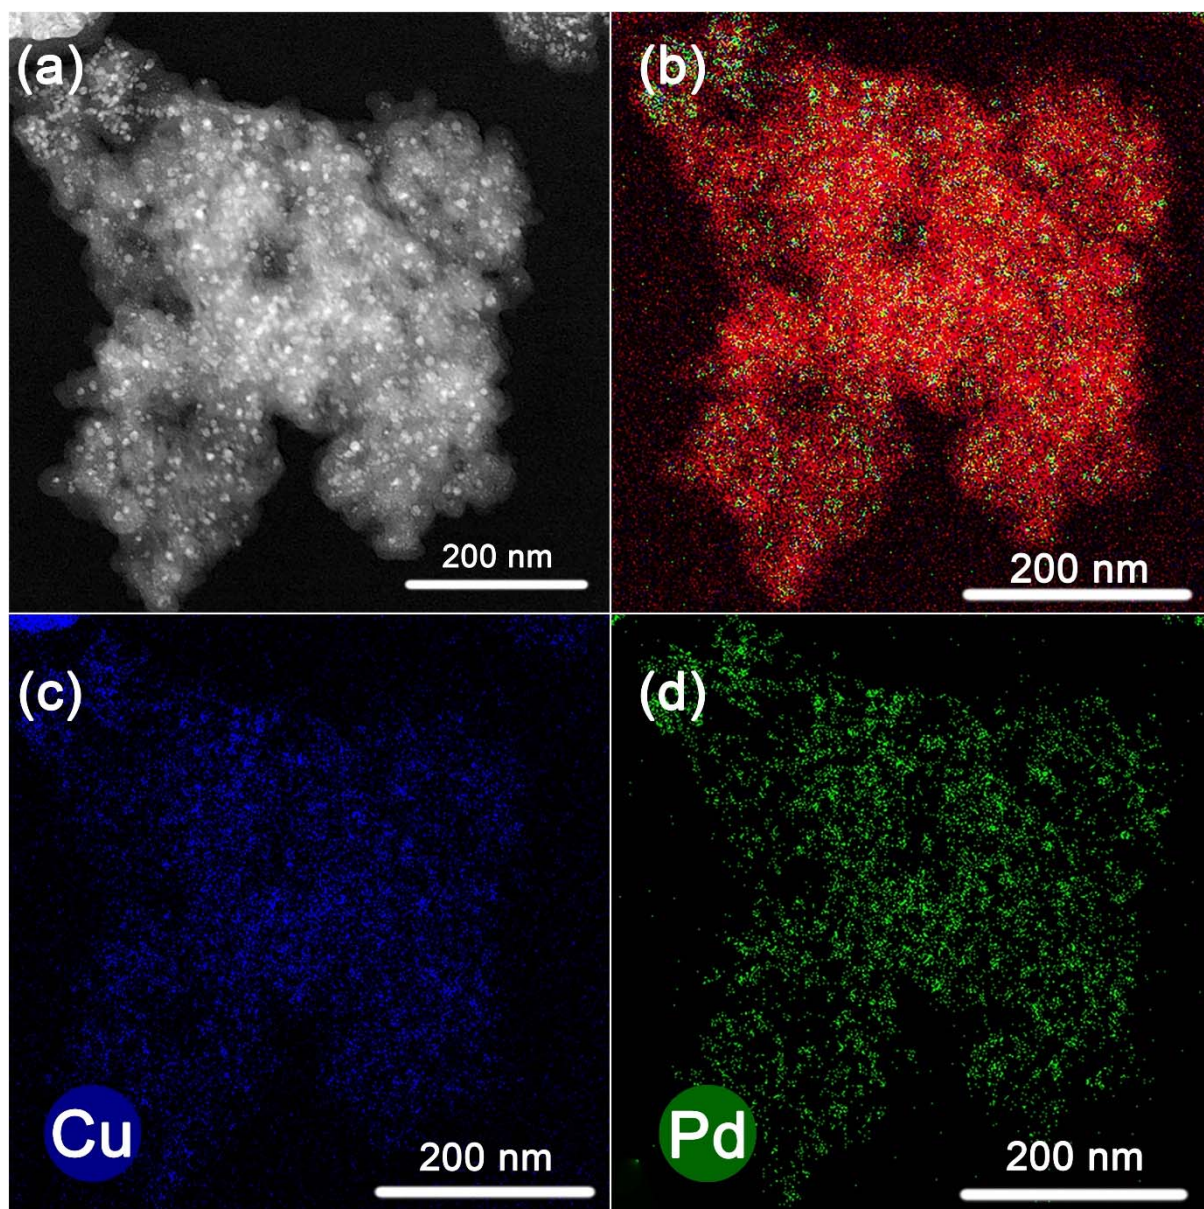

**Figure S1.** HAADF-STEM images of (a) PdCu@C nanocatalyst. Elemental mapping image of (b) total element (red: carbon), (c) copper (blue), and (d) palladium (green), respectively.

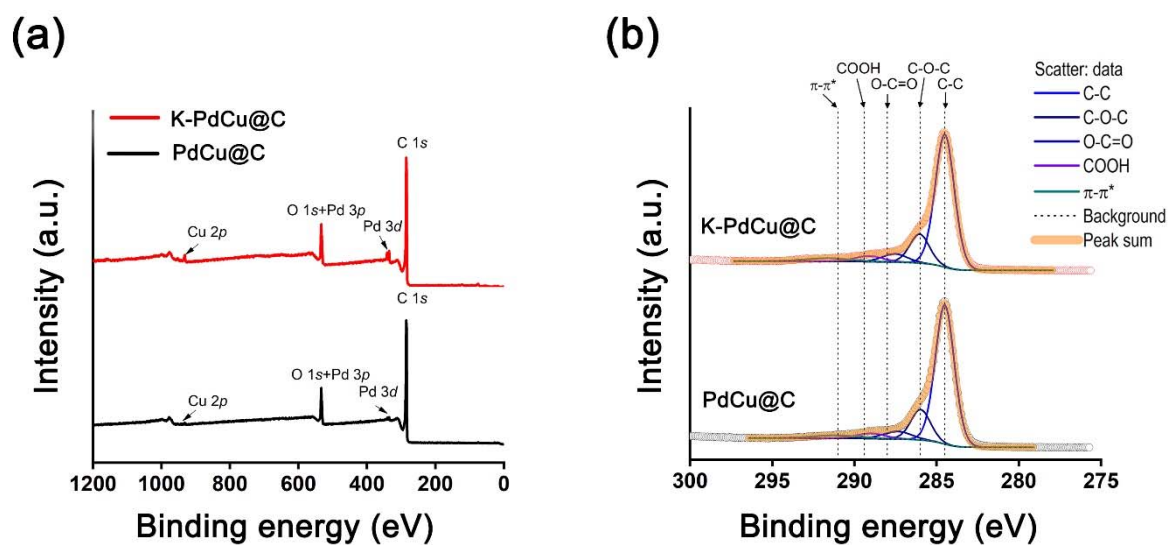

**Figure S2.** Core level X-ray photoelectron spectrum of (a) survey scan and (b) C 1s. The vertical dotted lines indicate the reference peak positions. The solid curves indicate deconvolution results.

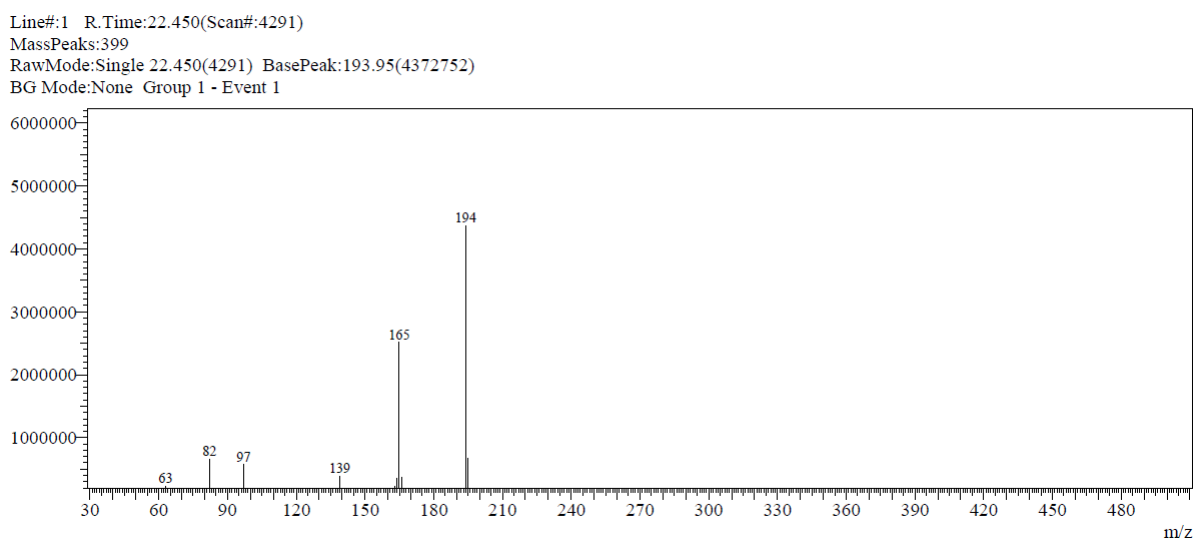

**Figure S3.** Mass spectra of 2-phenylbenzofuran.

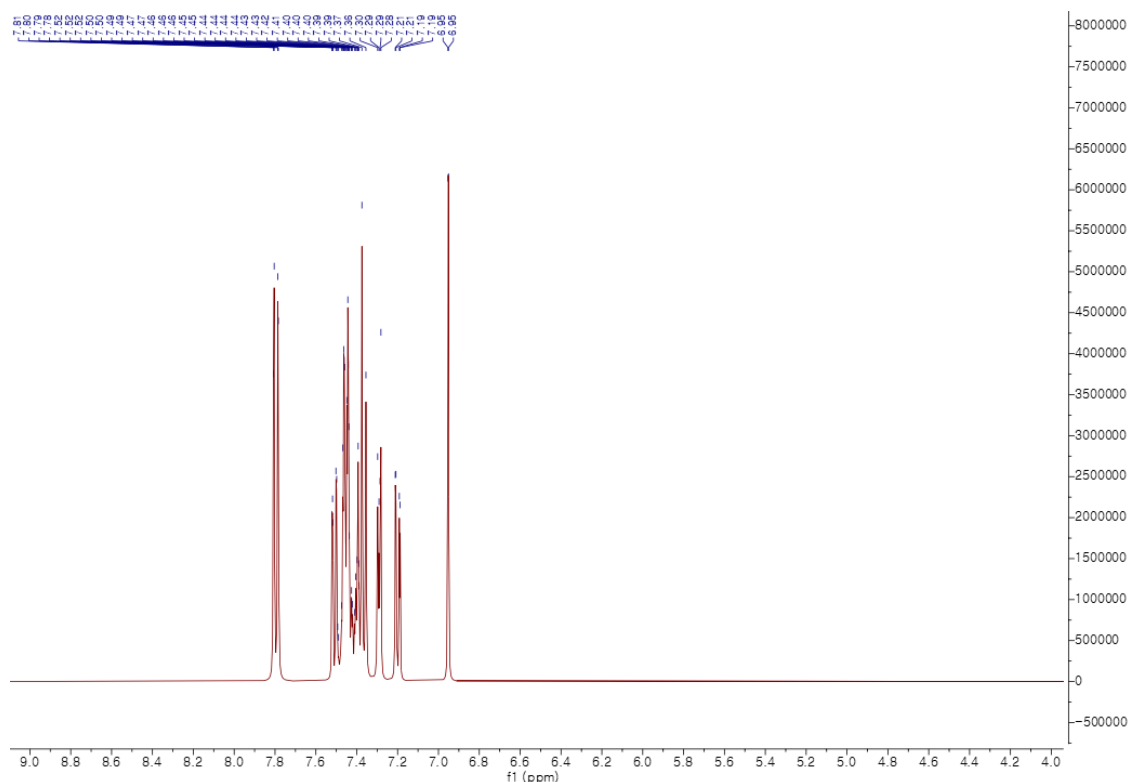

**Figure S4.** Proton NMR spectra of 2-phenylbenzofuran.

**Table S1.** Complementary analysis of elements in PdCu@C and K doped PdCu@C nanocatalysts using inductively coupled plasma optical emission spectrometers.

|                | Palladium (wt%) | Copper (wt%) | Potassium (wt%) |
|----------------|-----------------|--------------|-----------------|
| PdCu@C         | 21.8            | 13.5         | 0               |
| K doped PdCu@C | 19.9            | 13.3         | 0.47            |

**Table S2.** Complementary analysis of elements in after 5 times recovered K doped PdCu@C nanocatalyst using inductively coupled plasma optical emission spectrometers

|                       | Palladium (wt%) | Copper (wt%) | Potassium (wt%) |
|-----------------------|-----------------|--------------|-----------------|
| Reused K doped PdCu@C | 23.1            | 17.4         | 0.59            |
